# Supplementary material for: A low-charge-overpotential lithium-CO2cell based on a binary molten salt electrolyte
Source: Royal Society of Chemistry journal article supplement (doi:10.1039/d1ee00068c), 2021-01-01
Supplement: d1ee00068c1.pdf [file d1ee00068c1.pdf]

## Supporting information

# A Low-Charge-Overpotential Lithium-CO<sub>2</sub> Cell Based on Binary Molten Salt Electrolyte

Di Wang,<sup>‡ab</sup> Jingui Yang,<sup>‡a</sup> Ping He,<sup>\*a</sup> Haoshen Zhou<sup>\*ac</sup>

<sup>a</sup> Center of Energy Storage Materials & Technology, College of Engineering and Applied Sciences, Jiangsu Key Laboratory of Artificial Functional Materials, National Laboratory of Solid State Microstructures, and Collaborative Innovation Center of Advanced Microstructures, Nanjing University, Nanjing 210093, PR China

<sup>b</sup> School of energy science and engineering, Nanjing Tech university, 30 South Puzhu Road, Nanjing 211816, China

<sup>c</sup> National Institute of Advanced Industrial Science and Technology (AIST), Umezono 1-1-1, Tsukuba, 305-8568, Japan.

E-mail: pinghe@nju.edu.cn, hszhou@nju.edu.cn

**Keywords:** Li-CO<sub>2</sub> battery, molten salt, cycle stability, inorganic electrolyte, Ru catalyst

**Materials preparation.** All the containers and salts were dried in vacuum at 110 °C for 24 h, the salts were obtained from Sigma and used as received. Ru@Super P material was synthesized via a very similar method to previous work: 50 mg of RuCl<sub>3</sub>·xH<sub>2</sub>O (40% Ru content) was dissolved in 100 mL of ethylene glycol. 80 mg of Super P carbon was added into the solution and was uniformly mixed through an ultrasonic bath. The suspension was refluxed for 3 h at 170 °C. After cooling down, the supernatant was removed and the remnant mixture was centrifuged with deionized water and ethanol several times. The resulting products were dried in a vacuum oven at 80 °C for 12 h.

**Electrolyte.** The molten nitrate salt electrolyte was composed of lithium nitrate (99.99 %, Sigma-Aldrich) and potassium nitrate (≥99.0%, ReagentPlus®, Sigma-Aldrich)

with a mole ratio of 42:58. The organic electrolyte was composed of 1 M Lithium bis(trifluoromethane)sulfonamide (LiTFSI) in TEGDME. Before the preparation of molten nitrate electrolyte,  $\text{LiNO}_3$  and  $\text{KNO}_3$  were milled together (mole ratio of 42:58) by homogeneous mixing in an Ar-filled glovebox with  $\text{O}_2$  and  $\text{H}_2\text{O}$  levels maintained below 0.1 ppm.

**Cathode.** The  $\text{CO}_2$  cathode was prepared by pressing an as-prepared carbon material on the aluminum mesh with a diameter of 12 mm, the carbon material was a mixture of Super P (90 wt%) and polytetrafluoroethylene (PTFE, 10 wt%), no additional conductive additives were applied. The carbon loading on this  $\text{CO}_2$  cathode was  $\sim 2 \text{ mg/cm}^2$ . For molten salt-based Li- $\text{CO}_2$  cell, the as-prepared molten salt electrolyte was heated at 200 °C for 24 h, then, the prepared Super P cathode was impregnated in the molten nitrate.

**Assembling cells.** The as-prepared electrolyte was heated at 200 °C for 24 h, then, glass microfiber separator (Whatman) was impregnated in the molten nitrate for 5 minutes, the mass of the impregnated separator was increased 140-160 mg. Finally, the Super P cathode (or Ru@Super P cathode), separator, and Li anode were assembled in the homemade cell in a  $\text{CO}_2$ -filled homemade mold, the molten salt-cells were operated at 140 °C and the organic electrolyte-cells were operated at room temperature.

**Raman analysis.** Raman spectra were recorded using the 633 nm line of a semiconductor laser (Raman Confocal SNOM instrument) to investigate the surface composition of electrode, in order to avoid the exposure of the electrode to air, cathodes were removed from the cells and put into a homemade air-tight holder for the

characterization.

**GC-MS analysis.** In situ gas chromatography-mass spectrometry (GC-MS) measurements were conducted using a homemade cell which was connected to the equipment (Clarus 680 and SQ 8S).

**SEM analysis.** The Hitachi SU-8010 scanning electron microscope was used to observe the morphology of electrode.

**XPS analysis.** X-ray photoelectron spectroscopy (XPS) spectra of the electrode were recorded using a Thermo Fisher Scientific Model K-Alpha spectrometer equipped with Al K $\alpha$  radiation (1486.6 eV).

**XRD analysis.** The structure of the materials prepared in this article is characterized by X-ray diffraction (XRD) (D8 Advance, Bruker).

**TG-DTA analysis.** Thermogravimetric analysis was conducted on a TA Instrument SDT Q600 at a heating rate of 5 °C·min<sup>-1</sup>. Ru@Super P was test in air atmosphere at temperature range: 25 ~ 800 °C, and Li<sub>2</sub>CO<sub>3</sub>-KNO<sub>3</sub>-LiNO<sub>3</sub> was test in Ar atmosphere at temperature range: 30 ~ 300°C.

**FTIR analysis.** The ATR-FTIR spectra were obtained from NEXUS870.

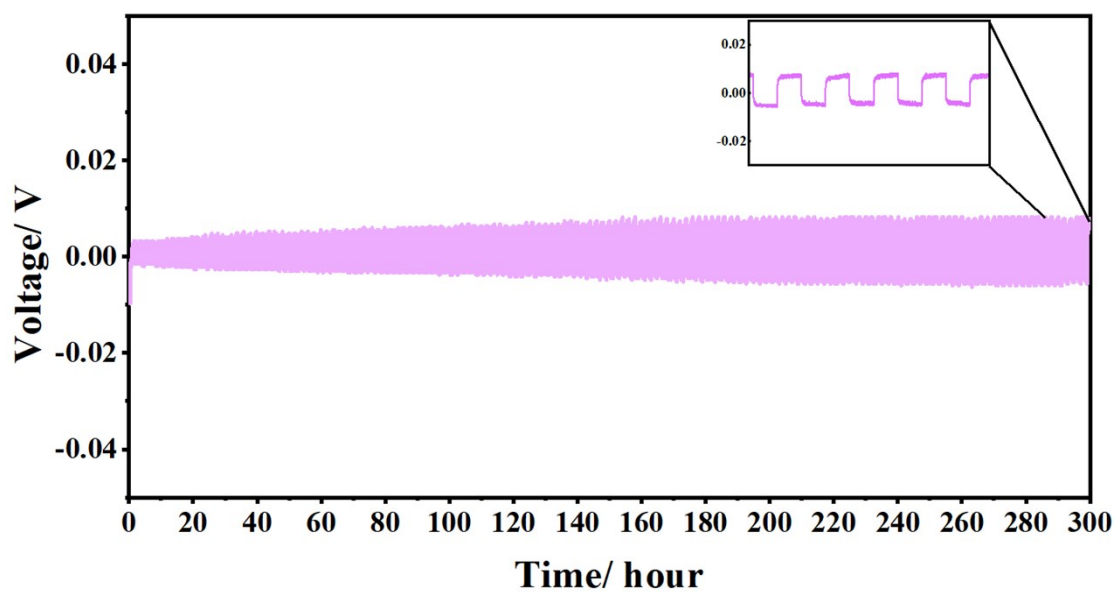

Figure S1. Voltage profile of Li|LiNO<sub>3</sub>-KNO<sub>3</sub>|Li symmetric cell using a current density of 1 mA·cm<sup>-2</sup> and a deposition/dissolution time for 1 h.

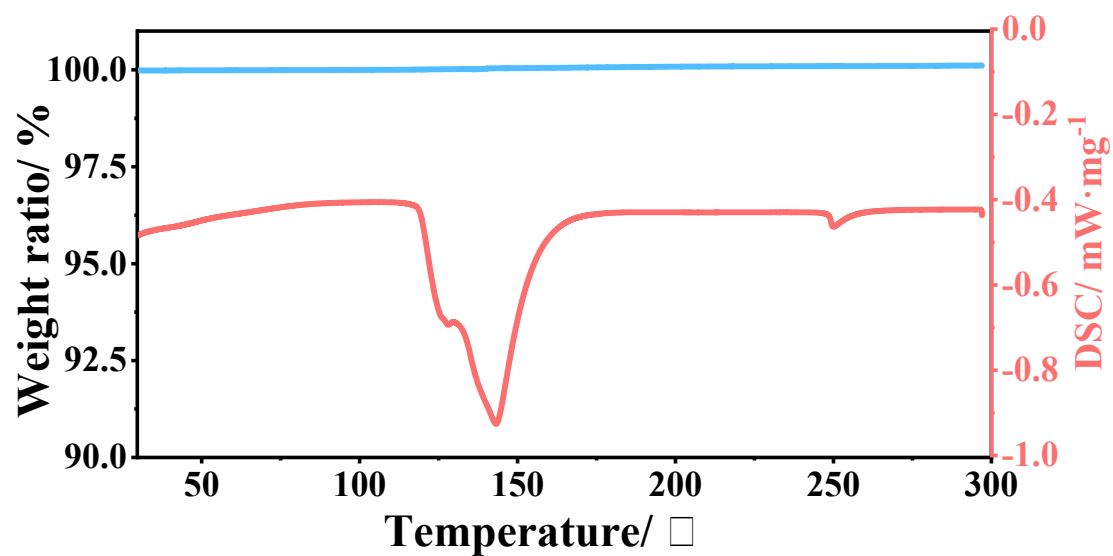

Figure S2. TGA result of the mixture of Li<sub>2</sub>CO<sub>3</sub>, KNO<sub>3</sub> and LiNO<sub>3</sub>. Temperature range: 30 ~ 300 °C. Heating rate: 5 °C / min.

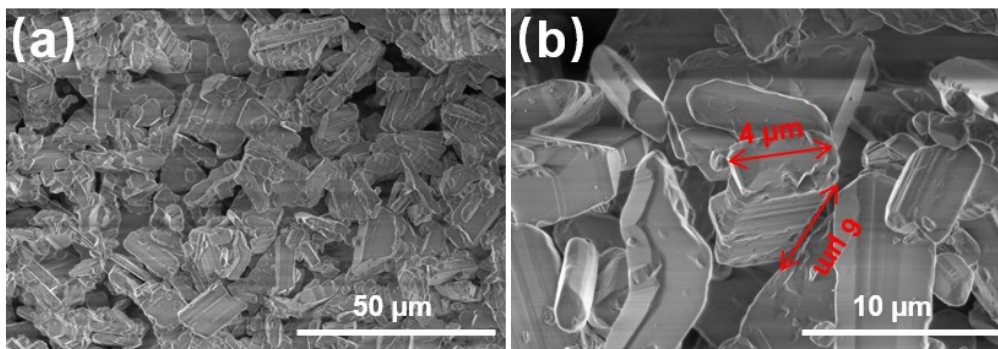

Figure S3. SEM images of the  $\text{Li}_2\text{CO}_3$  power ordered from Alfa Aesar.

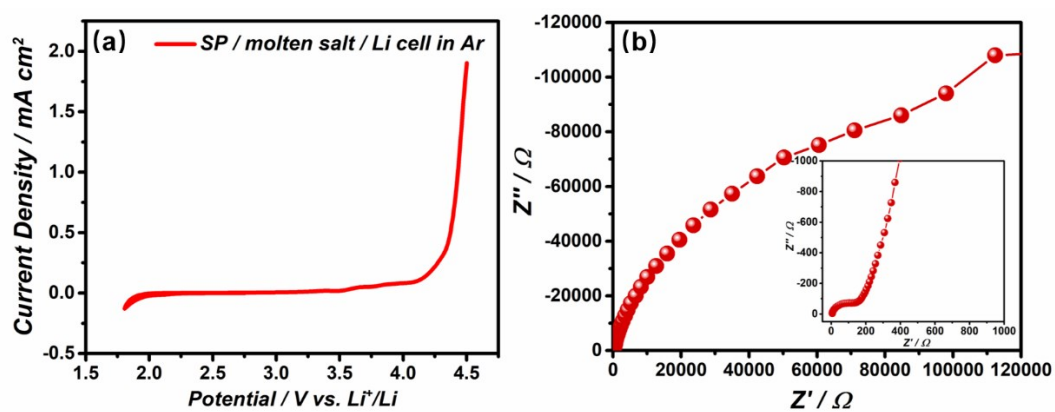

Figure S4. (a) Cyclic voltammetry curve of Super P electrode with molten salt electrolyte. Sweep rate:  $1 \text{ mV s}^{-1}$ ; (b) Nyquist plot of the molten salt electrolyte with two platinum plate electrodes ( $1 \text{ cm} \times 1 \text{ cm}$ ) at  $140^\circ\text{C}$ .

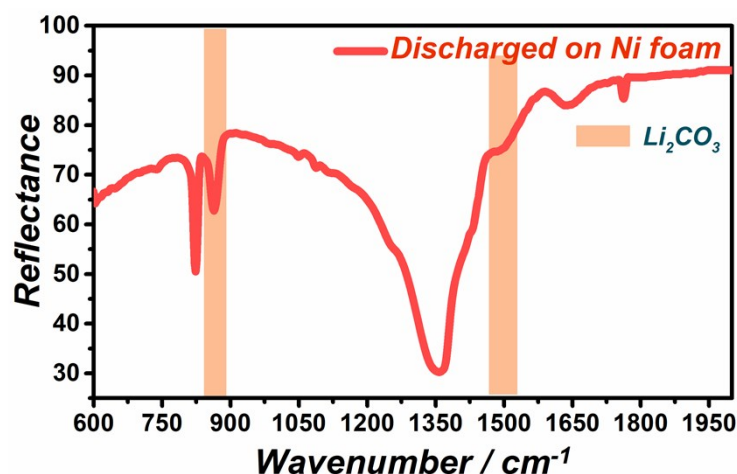

Figure S5. FT-IR of the discharged Ni foam cathode in  $\text{LiNO}_3/\text{KNO}_3$  molten nitrate electrolyte at  $100 \text{ mA g}^{-1}$ . Herein, the Ni foam cathode was lifted immediately from the molten electrolyte when the discharging process completed. NMA solvent was employed to remove residual nitrate/nitrite salts on the surface of the Ni foam electrode.

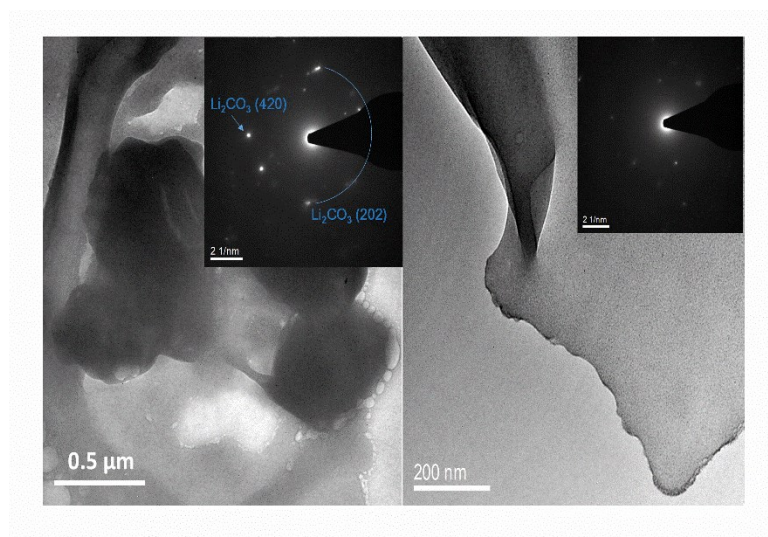

Figure S6. TEM images of the products from discharged Ni foam cathode in  $\text{LiNO}_3/\text{KNO}_3$  molten nitrate electrolyte at  $100 \text{ mA g}^{-1}$ . Herein, the Ni foam cathode was lifted immediately from the molten electrolyte when the discharging process completed. For the preparation of TEM measurement, Ni foam electrode removed from the molten electrolyte was ultrasonic for 30 min in ethanol solvent in Ar atmosphere, after that, a few drops of the ethanol solvent were dripped onto the copper grid.

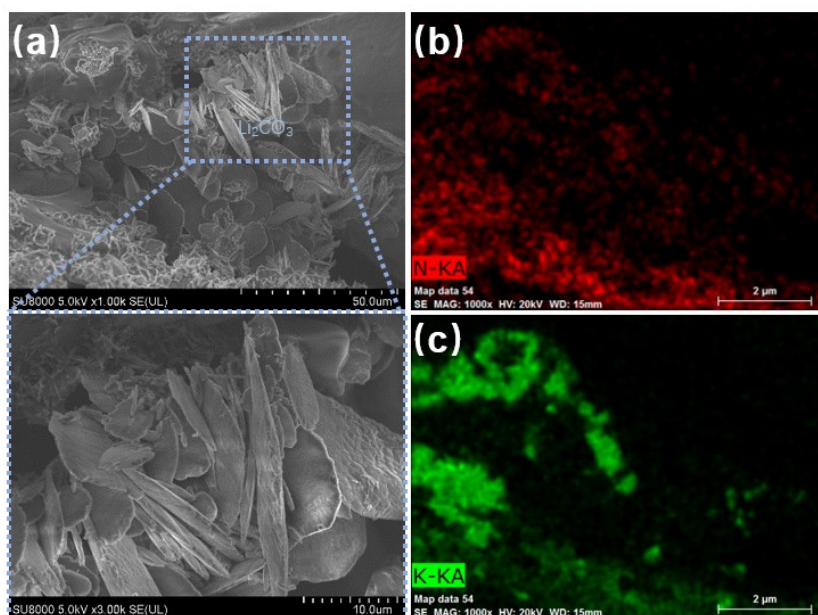

Figure S7. (a) SEM images of the Ni foam cathode (a); N (b) and K (c) element distribution images. In the region of the blue dotted line, neither K nor N was detected, flake particles in this region are speculated to be the discharge product of  $\text{Li}_2\text{CO}_3$ .

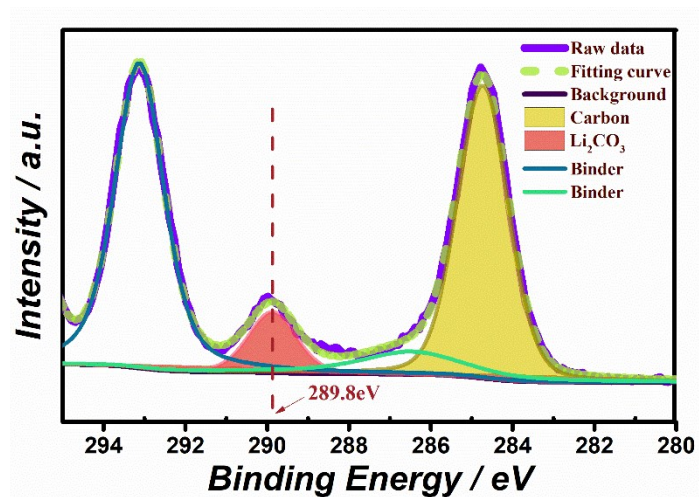

Figure S8. XPS spectra of the 30th recharged Super P cathode in  $\text{LiNO}_3/\text{KNO}_3$  molten nitrate electrolyte at 100 mA g<sup>-1</sup>. The peak corresponding to the C=O bond in  $\text{Li}_2\text{CO}_3$  at 289 eV is detected, indicating that  $\text{Li}_2\text{CO}_3$  formed during the discharge process cannot be completely oxidized after the subsequent recharge.

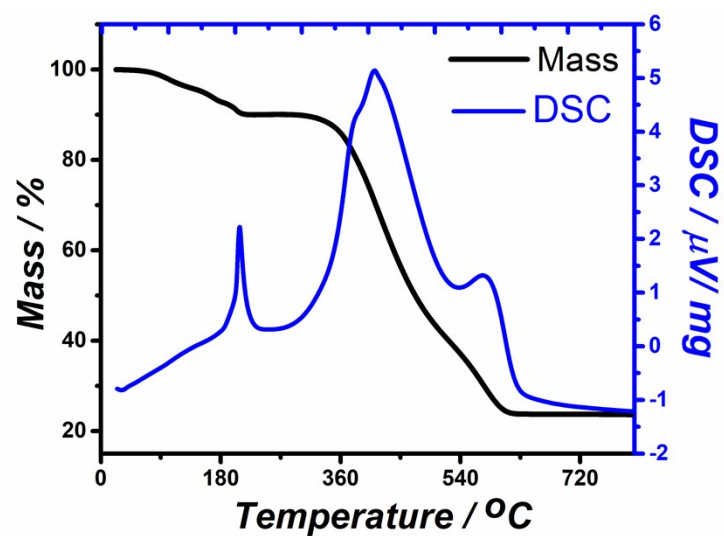

Figure S9. TG-DSC result of the Ru@Super P material. Temperature range: 25 ~ 800 °C. Heating rate: 5 °C / min.

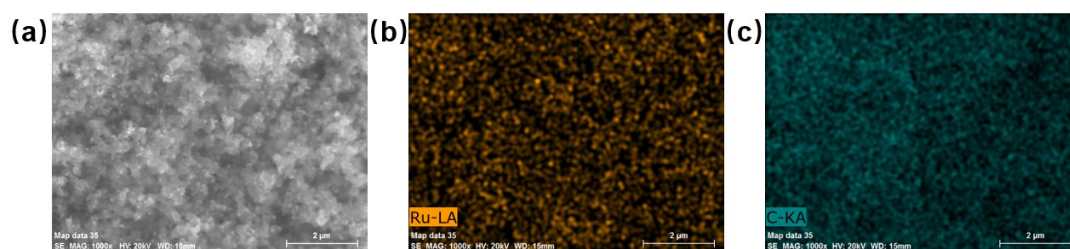

Figure S10. (a) SEM images of Ru@super P; Ru (b) and C (c) element distribution images.

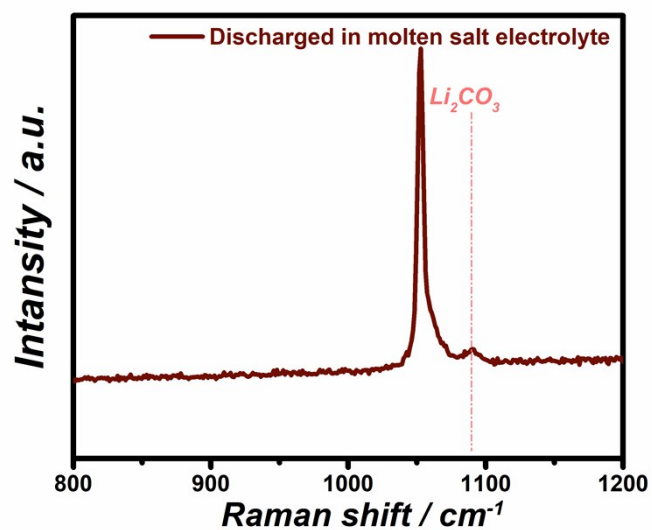

Figure S11. Raman result of the discharged Ru@Super P cathode in LiNO<sub>3</sub>/KNO<sub>3</sub> molten nitrate electrolyte at 100 mA g<sup>-1</sup>. Herein, the cathode was lifted immediately from the molten salt electrolyte when the discharging process completed.
